# Supplementary material for: Development of AO-176, a Next-Generation Humanized Anti-CD47 Antibody with Novel Anticancer Properties and Negligible Red Blood Cell Binding
Source: Oxford University Press journal article supplement (doi:10.1158/1535-7163.mct-19-1079), 2019-12-26
Supplement: 15357163mct191079-sup-232623_1_supp_5958521_q2f830.docx [file 15357163mct191079-sup-232623_1_supp_5958521_q2f830.docx]

**Supplemental Table 3** AO-176 promotes phagocytosis of tumor cell lines

| **Cell Line** | **Tumor Type** | **Phagocytosis EC50** |
| --- | --- | --- |
| Jurkat | Acute lymphoblastic leukemia | 3.4 nM (0.51 µg/ml) |
| Raji | B cell lymphoma | 2.3 nM (0.34 µg/ml) |
| SNU-1 | Gastric Carcinoma | 2.1 nM (0.32 µg/ml) |
| OV90 | Ovarian carcinoma | 1.1 nM (0.17 µg/ml) |
| Detroit562 | Pharyngeal carcinoma | 0.5 nM (0.08 µg/ml) |
| FaDu | Squamous cell carcinoma | 0.7 nM (0.1 µg/ml) |

EC50 values for phagocytosis of tumor cells was measured in in the hematologic and solid tumor cell lines shown at various concentrations of AO-176 or an isotype control IgG2 for 24 hours at 37°C. Detailed method can be found in the materials and methods of this manuscript.
