# Supplementary material for: Development of AO-176, a Next-Generation Humanized Anti-CD47 Antibody with Novel Anticancer Properties and Negligible Red Blood Cell Binding
Source: Oxford University Press journal article supplement (doi:10.1158/1535-7163.mct-19-1079), 2019-12-26
Supplement: 15357163mct191079-sup-232623_1_supp_5958549_q2f830.docx [file 15357163mct191079-sup-232623_1_supp_5958549_q2f830.docx]

**
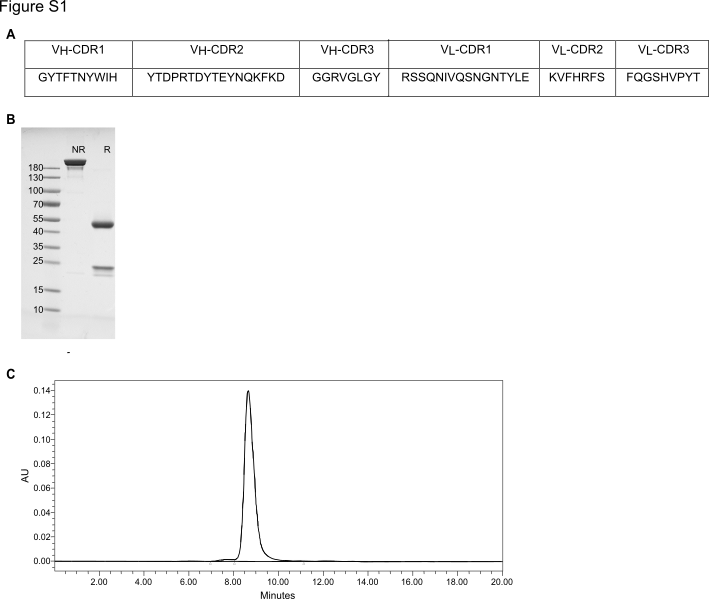
**

**Figure S1:** **AO-176 CDR sequence and analytical profile. (**A) antigen binding regions (CDRs 1-3) from the light and heavy variable regions of AO-176 (B) non-reducing (NR) and reducing (R) gel electrophoresis of AO-176. Protein was resolved by SDS-PAGE and the gel was stained using Coomassie brilliant blue R-250 dye. (C) analytical size exclusion chromatography (TSKgel G3000SWxl, 1ml/min, mobile phase 1xPBS) of native non-denatured AO-176 (monomer 98.4%, HMW 1.6%).
