# Supplementary material for: Development of AO-176, a Next-Generation Humanized Anti-CD47 Antibody with Novel Anticancer Properties and Negligible Red Blood Cell Binding
Source: Oxford University Press journal article supplement (doi:10.1158/1535-7163.mct-19-1079), 2019-12-26
Supplement: 15357163mct191079-sup-232623_1_supp_5958555_q2f830.docx [file 15357163mct191079-sup-232623_1_supp_5958555_q2f830.docx]

**
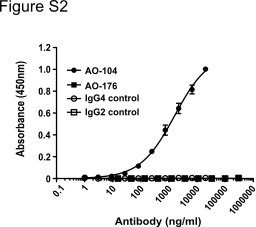
**

**Figure S2: AO-176 does not bind to mouse CD47.** Binding of AO-176 to recombinant His-tagged mouse CD47 was determined by solid phase ELISA. AO-104, a mouse CD47 cross reactive antibody, was used a positive control.
