# Supplementary material for: Development of AO-176, a Next-Generation Humanized Anti-CD47 Antibody with Novel Anticancer Properties and Negligible Red Blood Cell Binding
Source: Oxford University Press journal article supplement (doi:10.1158/1535-7163.mct-19-1079), 2019-12-26
Supplement: 15357163mct191079-sup-232623_1_supp_5958572_q2f830.docx [file 15357163mct191079-sup-232623_1_supp_5958572_q2f830.docx]

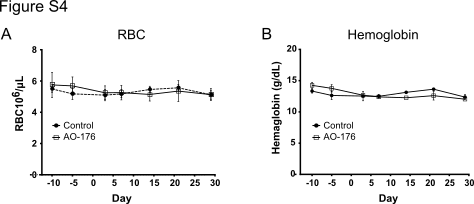


**Figure S4: Minimal reduction in RBC and hemoglobin in cynomolgus monkeys treated with 5 and 50 mg/kg AO-176.** Female cynomolgus monkeys (3 animals/group) were treated with vehicle (PBS) or with 5 mg/kg of AO-176 on day 1 and 50 mg/kg of AO-176 on days 8, 15 and 22, respectively, by 1 hour intravenous infusions. Blood samples were obtained at various times after the infusions and assessed for hematological parameters including **(A)** RBCs and **(B)** hemoglobin.

positive control.
