# Supplementary material for: Development of AO-176, a Next-Generation Humanized Anti-CD47 Antibody with Novel Anticancer Properties and Negligible Red Blood Cell Binding
Source: Oxford University Press journal article supplement (doi:10.1158/1535-7163.mct-19-1079), 2019-12-26
Supplement: 15357163mct191079-sup-232623_1_supp_5958573_q2f830.docx [file 15357163mct191079-sup-232623_1_supp_5958573_q2f830.docx]

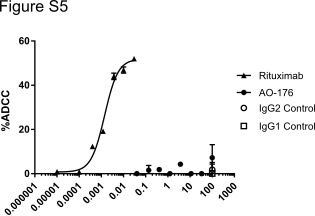


**Figure S5: AO-176 does not induce ADCC of Raji tumor cells.** Raji cells loaded with calcein-am were incubated with 0.01 ng/ml – 100 µg/ml AO-176 followed by co-culture with NK cells. Targeted killing of Raji cells was determined by measurement of released calcein by measuring fluorescence at 490 nm excitation/520 emission. Rituxan was used as a positive control.
